# Supplementary material for: Identification of key miRNAs and mRNAs related to coronary artery disease by meta-analysis
Source: Springer Nature journal article supplement (doi:10.1186/s12872-021-02211-2), 2021-09-16

**A** Gene dendrogram and module colors(GSE12288)

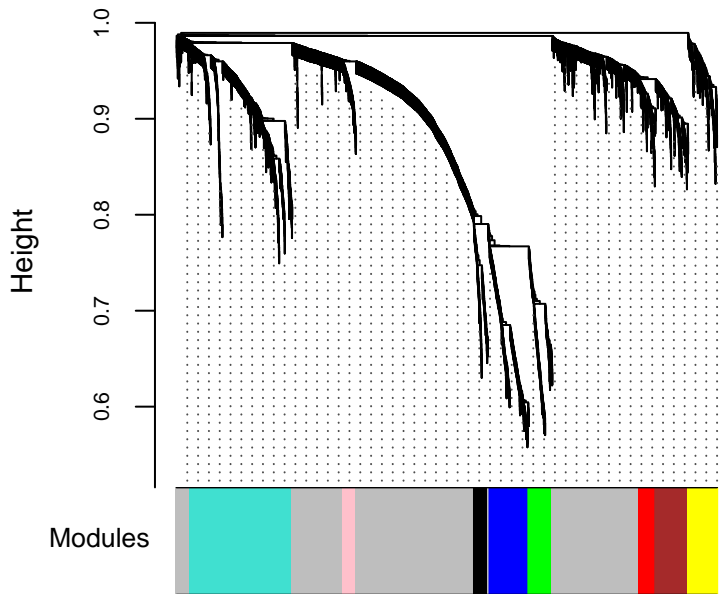

**B** Gene dendrogram and module colors (GSE20681)

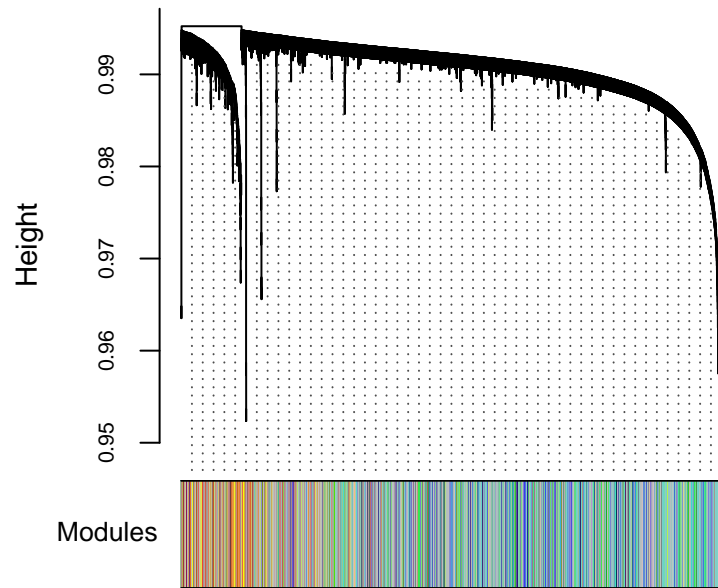

**C** Gene dendrogram and module colors (GSE20680)

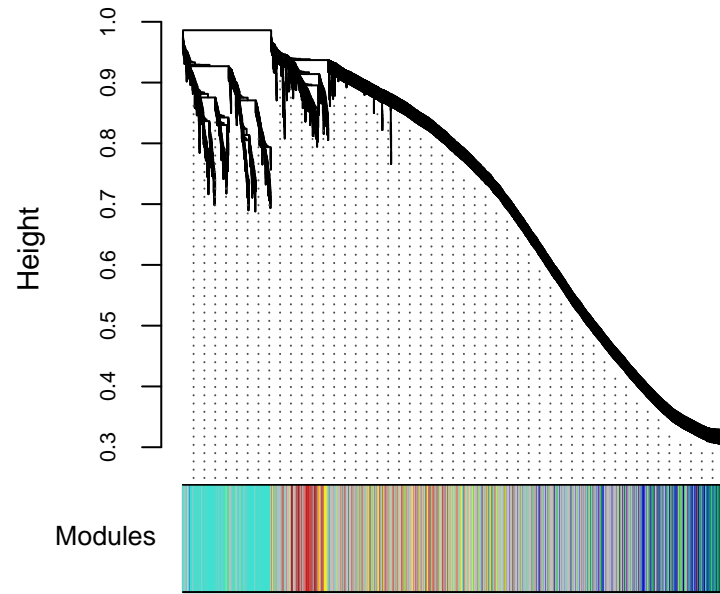

Supplement: MOESM1 [file 19669122]
